# Supplementary material for: Interface engineering of the NiO/CeO2@NF heterostructure to boost the electro-oxidation of 5-hydroxymethylfurfural
Source: Royal Society of Chemistry journal article supplement (doi:10.1039/d3dt01259j), 2023-01-01
Supplement: d3dt01259j1.pdf [file d3dt01259j1.pdf]

## Supporting Information

### Interface engineering for NiO/CeO<sub>2</sub>@NF heterostructure to boost the electro-oxidation of 5-hydroxymethylfurfural

Xiu He<sup>a</sup>, ZhenZhen Mo<sup>\*b</sup>, Huiling Liu<sup>\*a</sup>, and Cheng Wang<sup>a</sup>

<sup>a</sup> Tianjin Key Laboratory of Advanced Functional Porous Materials and Center for Electron Microscopy, Institute for New Energy Materials & Low-Carbon Technologies, School of Materials Science and Engineering, Tianjin University of Technology, Tianjin 300384, China

<sup>b</sup> School of Environmental Science and Safety Engineering, Tianjin University of Technology, Tianjin 300384, PR China.

E-mail: hlliu\_tjut2016@163.com; zhenmo199@email.tjut.edu.cn

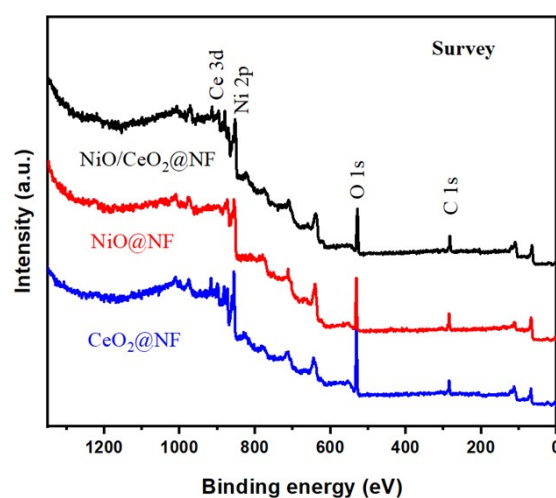

Figure S1. XPS survey spectra of the NiO/CeO<sub>2</sub>@NF, NiO@NF and CeO<sub>2</sub>@NF.

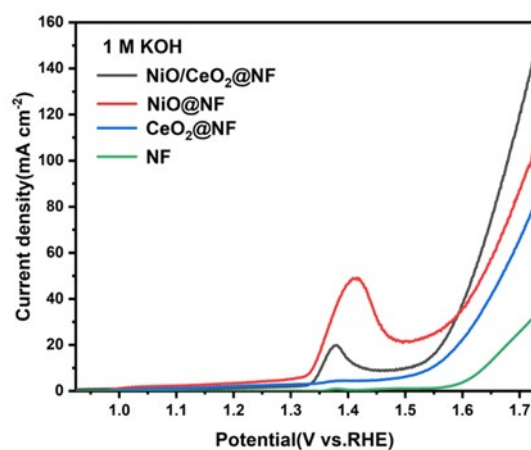

Figure S2. LSV curves of NiO/CeO<sub>2</sub>@NF, NiO@NF and NiO/CeO<sub>2</sub>@NF in 1 M KOH.

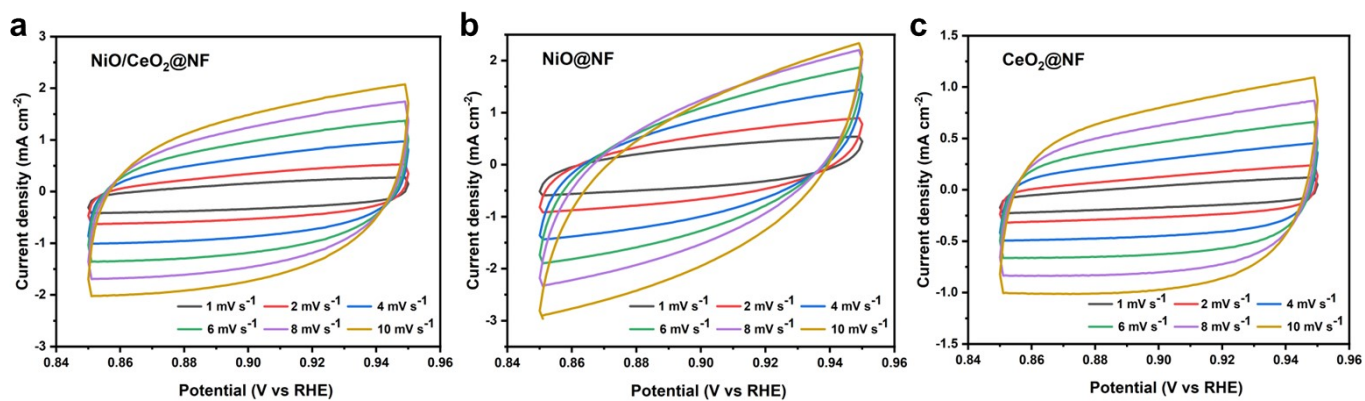

Figure S3. CV curves of (a) NiO/CeO<sub>2</sub>@NF, (b) NiO@NF and (c) CeO<sub>2</sub>@NF with 50 mM HMF at different scan rates.

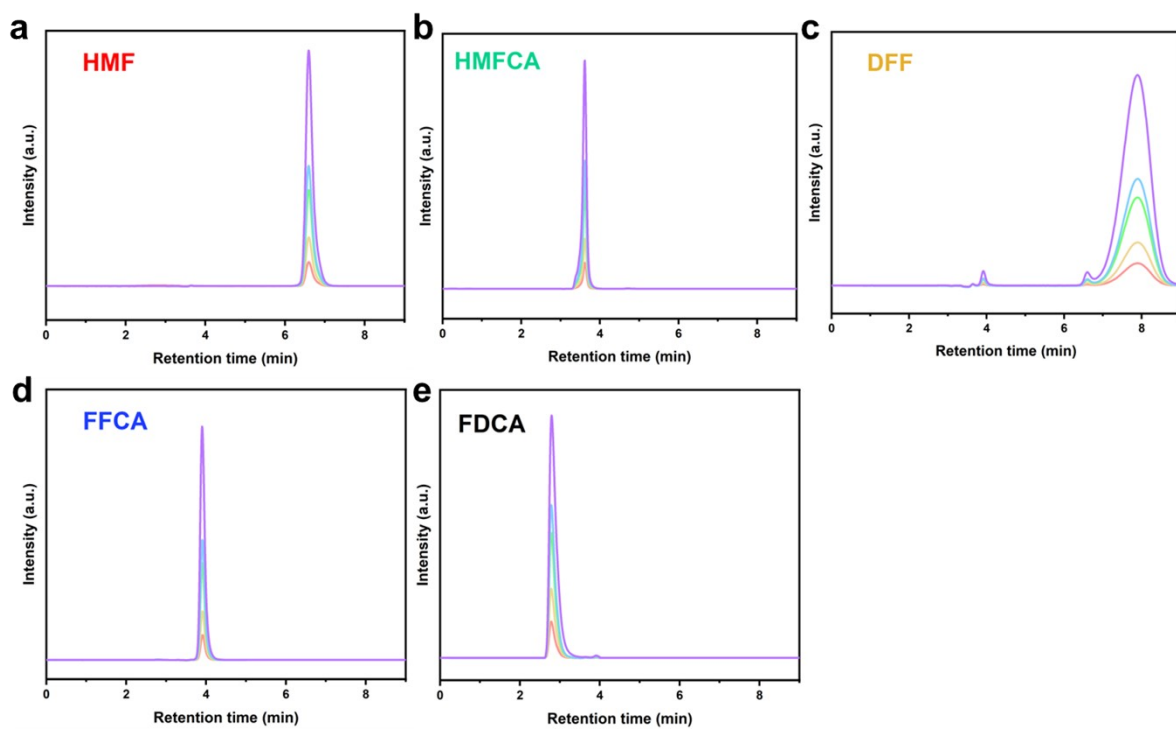

Figure S4. HPLC standard curves for (a) HMF, (b) HMFCA, (c) DFF, (d) FFCA and (e) FDCA.

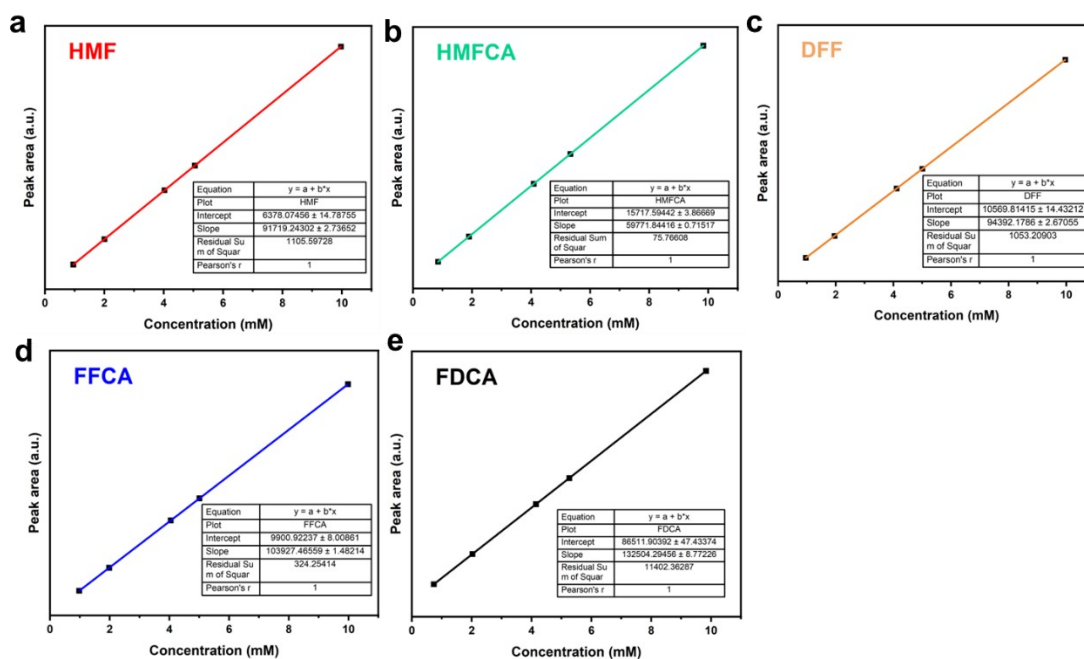

Figure S5. HPLC calibration curves for (a) HMF, (b) HMFCa, (c) DFF, (d) FFCA and (e) FDCA.

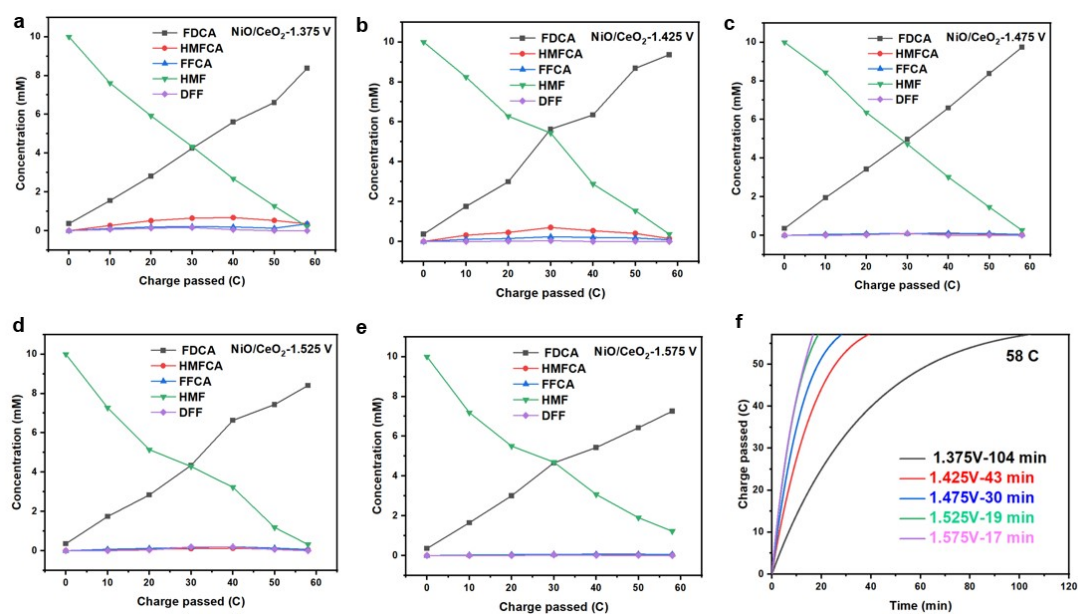

Figure S6. The concentrations of (a) HMF, (b) HMFCa, (c) FFCA, (d) DFF, and (e) FDCA with different electrolysis potentials under the fixed theoretical charge of 58 C. (f) The time to reach theoretical charge (58 C) at different potentials.

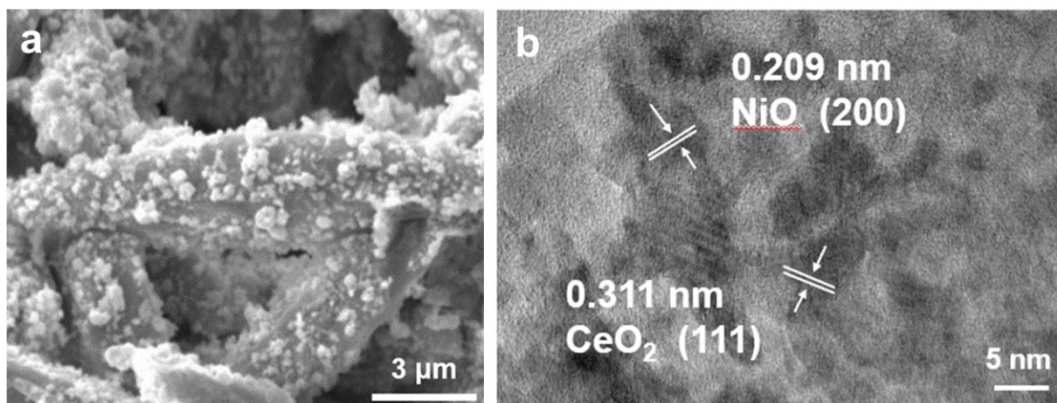

Figure S7. (a) SEM, (b) HRTEM images of the NiO/CeO<sub>2</sub>@NF sample after 10 cycles of electrolysis.

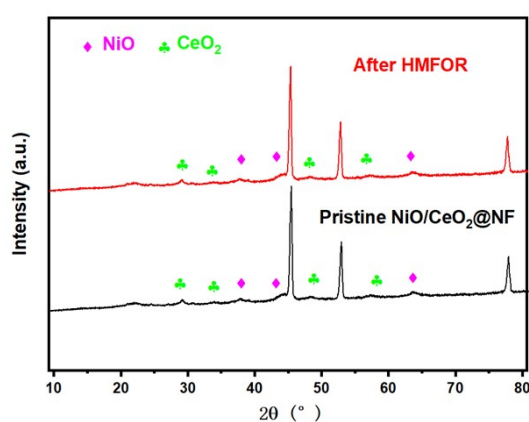

Figure S8. XRD patterns of the as-synthesized NiO/CeO<sub>2</sub>@NF before and after HMF electrooxidation.

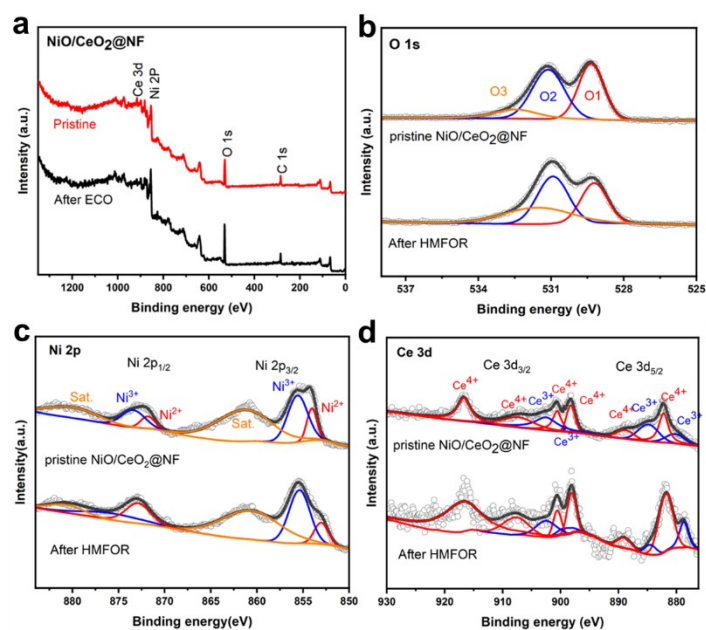

Figure S9. (a) XPS survey spectra, (b) O 1s, (c) Ni 2p and (d) Ce 3d XPS spectra of the NiO/CeO<sub>2</sub>@NF sample before and after 10 cycles of electrolysis.

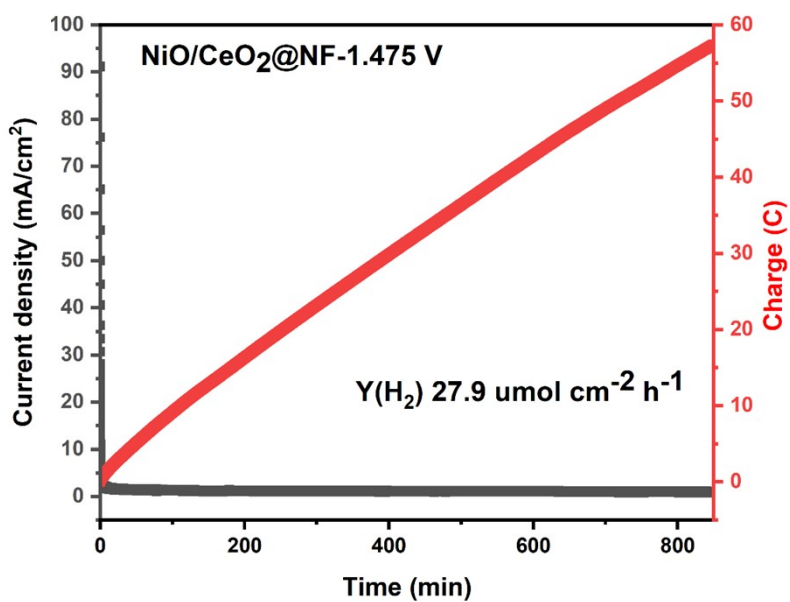

Figure S10. The current-time and charge-time curves during water splitting without HMF.

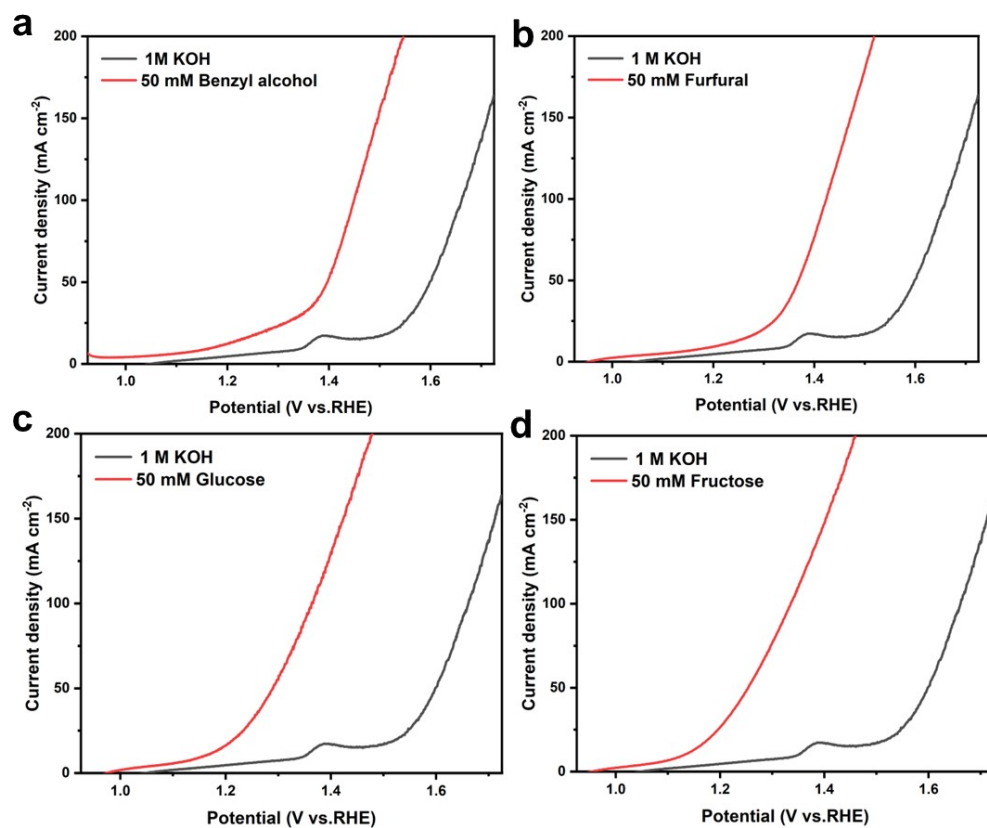

Figure S11. (a-d) LSV curves of the NiO/CeO<sub>2</sub>@NF at a scan rate of 5 mV s<sup>-1</sup> in 1.0 M KOH with and without benzyl alcohol, furfural, glucose and fructose.

Table S1. The ratio of Ni<sup>3+</sup>/Ni<sup>2+</sup>, Ce<sup>4+</sup>/Ce<sup>3+</sup> and O2 was obtained from XPS results.

| NiO/CeO <sub>2</sub> @NF | Ni <sup>3+</sup> /Ni <sup>2+</sup> | Ce <sup>4+</sup> /Ce <sup>3+</sup> | O2   |
|--------------------------|------------------------------------|------------------------------------|------|
| pristine                 | 3.0                                | 2.7                                | 0.46 |
| After HMFOR              | 2.3                                | 4.3                                | 0.4  |

Table S2. The FDCA yield rates on the NiO/CeO<sub>2</sub>@NF catalyst under different potentials.

| Potential (V vs. RHE)                                    | 1.375 | 1.425 | 1.475  | 1.525 | 1.575  |
|----------------------------------------------------------|-------|-------|--------|-------|--------|
| FDCA yield rate (μmol cm <sup>-2</sup> h <sup>-1</sup> ) | 49.31 | 125.1 | 197.92 | 282.5 | 302.96 |

Table S3. The comparison of activity for NiO/CeO<sub>2</sub>@NF and other reported HMF electrochemical oxidation catalysts.

| Catalyst                                            | Potential (V vs RHE) | C <sub>HMF</sub> (mM) | HMF Conversion (%) | FDCA Yield (%) | Faradic Efficiency (%) | Ref.      |
|-----------------------------------------------------|----------------------|-----------------------|--------------------|----------------|------------------------|-----------|
| NiO/CeO <sub>2</sub> @NF                            | 1.475                | 10                    | 100                | 99.0           | 98.96                  | This work |
| NiCo <sub>2</sub> O <sub>4</sub> /NF                | 1.43                 | 5                     | 99.6               | 90.4           | 90.8                   | 1         |
| Ni <sub>3</sub> S <sub>2</sub> /NF                  | 1.498                | 10                    | 100                | 98             | 94                     | 2         |
| NiFe-LDH                                            | 1.48                 | 10                    | 97.4               | 96.8           | 84.5                   | 3         |
| NiCoFe-LDHS                                         | 1.55                 | 10                    | 95.5               | 95             | 90                     | 4         |
| NiO-Co <sub>3</sub> O <sub>4</sub>                  | 1.45                 | 10                    | 100                | 98             | 96                     | 5         |
| Ni <sub>2</sub> P NPA/NF                            | 1.423                | 10                    | 100                | 98             | 98                     | 6         |
| NiCoP                                               | 1.464                | 300                   | 98.7               | 98.8           | 96.1                   | 7         |
| CoNiS@NF                                            | 1.45                 | 10                    | 100                | 100            | 99.1                   | 8         |
| NF@Co <sub>3</sub> O <sub>4</sub> /CeO <sub>2</sub> | 1.4                  | 50                    | 98                 | 94.5           | 97.5                   | 9         |

|                                                                |      |    |     |      |      |    |
|----------------------------------------------------------------|------|----|-----|------|------|----|
| Ni <sub>3</sub> N@C                                            | 1.45 | 10 | 100 | 98   | 99   | 10 |
| CoP/Ni <sub>2</sub> P-<br>NiCoP@NC                             | 1.45 | 5  | 100 | 98.1 | 97.6 | 11 |
| Co-NixP@C                                                      | 1.56 | 10 | -   | 100  | 98.9 | 12 |
| NiS <sub>x</sub> /Ni <sub>2</sub> P                            | 1.46 | 10 | 100 | 98.5 | 95.1 | 13 |
| Co <sub>9</sub> S <sub>8</sub> -Ni <sub>3</sub> S <sub>2</sub> | 1.4  | 10 | 100 | 98.8 | 98.6 | 14 |
| Ni/NiO                                                         | 1.45 | 50 | 95  | 91   | 95   | 15 |

### References:

1. M. J. Kang, H. Park, J. Jegal, S. Y. Hwang, Y. S. Kang and H. G. Cha, *Applied Catalysis B: Environmental*, 2019, **242**, 85-91.
2. F. K. Z. Z. Wei Wang, *Dalton Trans.*, 2021, **50**, 10922-10927.
3. K. W. Y. S. Yu-Feng Qi, *ACS Sustainable Chem. Eng.*, 2022, **10**, 645-654.
4. Y. L. B. L. Man Zhang, *ACS CATAL*, 2020, **10**, 5179-5189.
5. Y. Lu, C. Dong, Y. Huang, Y. Zou, Y. Liu, Y. Li, N. Zhang, W. Chen, L. Zhou, H. Lin and S. Wang, *Sci.China.Chem.*, 2020, **63**, 980-986.
6. B. You, N. Jiang, X. Liu and Y. Sun, *Angew. Chem. Int. Ed.*, 2016, **128**, 10067-10071.
7. C. L. J. A. Honglei Wang, *J. Mater. Chem. A*, 2021, **9**, 18421-18430.
8. J. W. Y. Q. Yan Sun, *Adv. Sci.*, 2022, **9**, 2200957-2200968.
9. G. H. P. Z. Gongchi Zhao, *ADV FUNCT MATER*, 2023, **33**, 2213170-2213180.
10. N. Zhang, Y. Zou, L. Tao, W. Chen, L. Zhou, Z. Liu, B. Zhou, G. Huang, H. Lin and S. Wang, *Angew. Chem.*, 2019, **58**, 15895-15903.
11. J. C. A. Y. Mingjun Zhou, *Catal. Sci. Technol.*, 2022, **12**, 4288-4297.
12. D. Z. D. L. Miaomiao Xing, *Journal of Colloid and Interface Science*, 2023, **629**, 451-460.
13. H. F. A. T. Baolong Zhang, *Green Chem.*, 2022, **24**, 877-884.

14. Z. X. X. Z. Yibin Zhang, *Green Chem.*, 2022, **24**, 1721-1731.
15. Z. Z. C. S. Jianmin Wang, *Catal. Sci. Technol.*, 2021, **11**, 2480-2490.
